# Supplementary material
Source: PubMed Central journal article supplement (PMC3753537)

## Supplemental Material

### Multiple Inflammatory Biomarkers in Relation to Cardiovascular Events and Mortality in the Community

Renate B. Schnabel, MD, MSc; Xiaoyan Yin, PhD; Martin G. Larson, ScD;  
Jennifer F. Yamamoto, MS; João D. Fontes, MD; Sekar Kathiresan, MD; Jian Rong, PhD;  
Daniel Levy, MD; John F. Keaney, Jr., MD; Thomas J. Wang, MD; Joanne M. Murabito, MD;  
Ramachandran S. Vasan, MD; Emelia J. Benjamin, MD, ScM

#### Table of Contents for Electronic Supplement

|                                |                                                                                                                                                                 |
|--------------------------------|-----------------------------------------------------------------------------------------------------------------------------------------------------------------|
| <b>Supplementary Table I</b>   | Baseline Characteristics of the Study Sample by exclusion                                                                                                       |
| <b>Supplementary Table II.</b> | Multivariable-Adjusted Cox Proportional Hazards Regression Models Examining Each Circulating Inflammatory Biomarker Separately in Relation to CVD               |
| <b>Supplementary Table III</b> | Multivariable-Adjusted Cox Proportional Hazards Regression Models Examining Each Circulating Inflammatory Biomarker Separately in Relation to Overall Mortality |
| <b>Supplementary Figure I.</b> | Sex-specific adjusted Survival Curves by Tertile of the Biomarker Score Incorporating the Top Two Inflammatory Markers                                          |

## Inflammatory biomarkers and cardiovascular outcome and mortality

**Supplementary Table I. Baseline Characteristics of the Study Sample by Exclusion**

|                                            | <b>Analyzed<br/>N=3035)</b> | <b>Excluded<br/>N=290</b> |
|--------------------------------------------|-----------------------------|---------------------------|
| Age, years                                 | 61±9                        | 61±9                      |
| Women, %                                   | 1623 (53)                   | 157(54)                   |
| Cigarette smoking, %                       | 398 (13)                    | 38(13)                    |
| Body mass index, kg/m <sup>2</sup>         | 28.1±5.3                    | 28.6±5.8                  |
| Systolic blood pressure, mm Hg             | 127±19                      | 127±20                    |
| Diabetes, %                                | 400 (13)                    | 45 (16)                   |
| Total/high density lipoprotein cholesterol | 4.1±1.3                     | 4.1±1.4                   |
| Hypertension treatment, %                  | 1028 (34)                   | 97 (34)                   |
| Lipid treatment, %                         | 622 (20)                    | 62 (21)                   |
| Aspirin ≥3 per week, %                     | 963 (32)                    | 92 (32)                   |
| Hormone replacement therapy, %             | 499 (16)                    | 53 (18)                   |
| Prevalent cardiovascular disease, %        | 208 (7)                     | 30 (10)                   |

Data are presented as mean±SD for continuous variables and n (percentage) for dichotomous variables.

## Inflammatory biomarkers and cardiovascular outcome and mortality

**Supplementary Table II.** Multivariable-Adjusted Cox Proportional Hazards Regression Models Examining Each Circulating Inflammatory Biomarker Separately in Relation to CVD

| Variable                                | Hazard Ratio | 95% Confidence Interval |      | Nominal P-Value |
|-----------------------------------------|--------------|-------------------------|------|-----------------|
| CD40 ligand                             | 0.92         | 0.80                    | 1.04 | 0.18            |
| CRP                                     | 1.21         | 1.06                    | 1.39 | 0.006           |
| Fibrinogen                              | 1.18         | 1.03                    | 1.36 | 0.02            |
| Intercellular adhesion molecule-1       | 1.12         | 1.00                    | 1.27 | 0.054           |
| Interleukin-6                           | 1.16         | 1.01                    | 1.32 | 0.03            |
| Lipoprotein-associated phospholipase A2 |              |                         |      |                 |
| Activity                                | 1.05         | 0.90                    | 1.22 | 0.55            |
| Mass                                    | 0.99         | 0.87                    | 1.12 | 0.82            |
| Monocyte chemoattractant protein-1      | 1.09         | 0.95                    | 1.24 | 0.22            |
| Myeloperoxidase                         | 1.01         | 0.89                    | 1.15 | 0.84            |
| P-selectin                              | 0.97         | 0.85                    | 1.10 | 0.64            |
| Tumor necrosis factor receptor II       | 1.19         | 1.04                    | 1.35 | 0.009           |

Hazard ratios, per one standard deviation increase in ln-biomarker concentration, are adjusted for age, sex, smoking, systolic blood pressure, hypertension treatment, total/HDL cholesterol, body mass index, and diabetes.

## Inflammatory biomarkers and cardiovascular outcome and mortality

**Supplementary Table III.** Multivariable-Adjusted Cox Proportional Hazards Regression Models Examining Each Circulating Inflammatory Biomarker Separately in Relation to Overall Mortality

| Variable                                | Mean±SD<br>Ln Biomarker | Hazard<br>Ratio | 95% Confidence<br>Interval |      | Nominal<br>P-Value |
|-----------------------------------------|-------------------------|-----------------|----------------------------|------|--------------------|
| CD40 ligand                             | 0.41±1.23               | 1.00            | 0.90                       | 1.12 | 0.97               |
| CRP                                     | 0.82±1.12               | 1.32            | 1.18                       | 1.48 | <0.0001            |
| Fibrinogen                              | 5.92±0.19               | 1.15            | 1.03                       | 1.29 | 0.02               |
| Intercellular adhesion molecule-1       | 5.52±0.25               | 1.41            | 1.29                       | 1.54 | <0.0001            |
| Interleukin-6                           | 1.07±0.71               | 1.41            | 1.28                       | 1.55 | <0.0001            |
| Lipoprotein-associated phospholipase A2 |                         |                 |                            |      |                    |
| Activity                                | 4.93±0.25               | 1.16            | 1.01                       | 1.32 | 0.03               |
| Mass                                    | 5.65±0.32               | 1.07            | 0.96                       | 1.19 | 0.20               |
| Monocyte chemoattractant protein-1      | 5.74±0.34               | 1.03            | 0.92                       | 1.15 | 0.63               |
| Myeloperoxidase                         | 3.71±0.57               | 1.02            | 0.91                       | 1.13 | 0.78               |
| P-selectin                              | 3.57±0.37               | 1.10            | 0.99                       | 1.23 | 0.08               |
| Tumor necrosis factor receptor II       | 7.62±0.31               | 1.53            | 1.38                       | 1.70 | <0.0001            |

Inflammatory biomarker concentrations are natural log-transformed.

Hazard ratios, per one standard deviation increase in ln-biomarker concentration, are adjusted for age, sex, smoking, systolic blood pressure, total/HDL cholesterol, hypertension treatment, body mass index, diabetes, and prevalent major CVD (see text for definitions).

## Inflammatory biomarkers and cardiovascular outcome and mortality

**Supplementary Figure I.** Sex-specific adjusted survival curves by tertile of the biomarker score incorporating the top two inflammatory markers (CRP and TNFR1I) for men (A) and women (B). The numbers of participants at risk are displayed below the figure.

A.

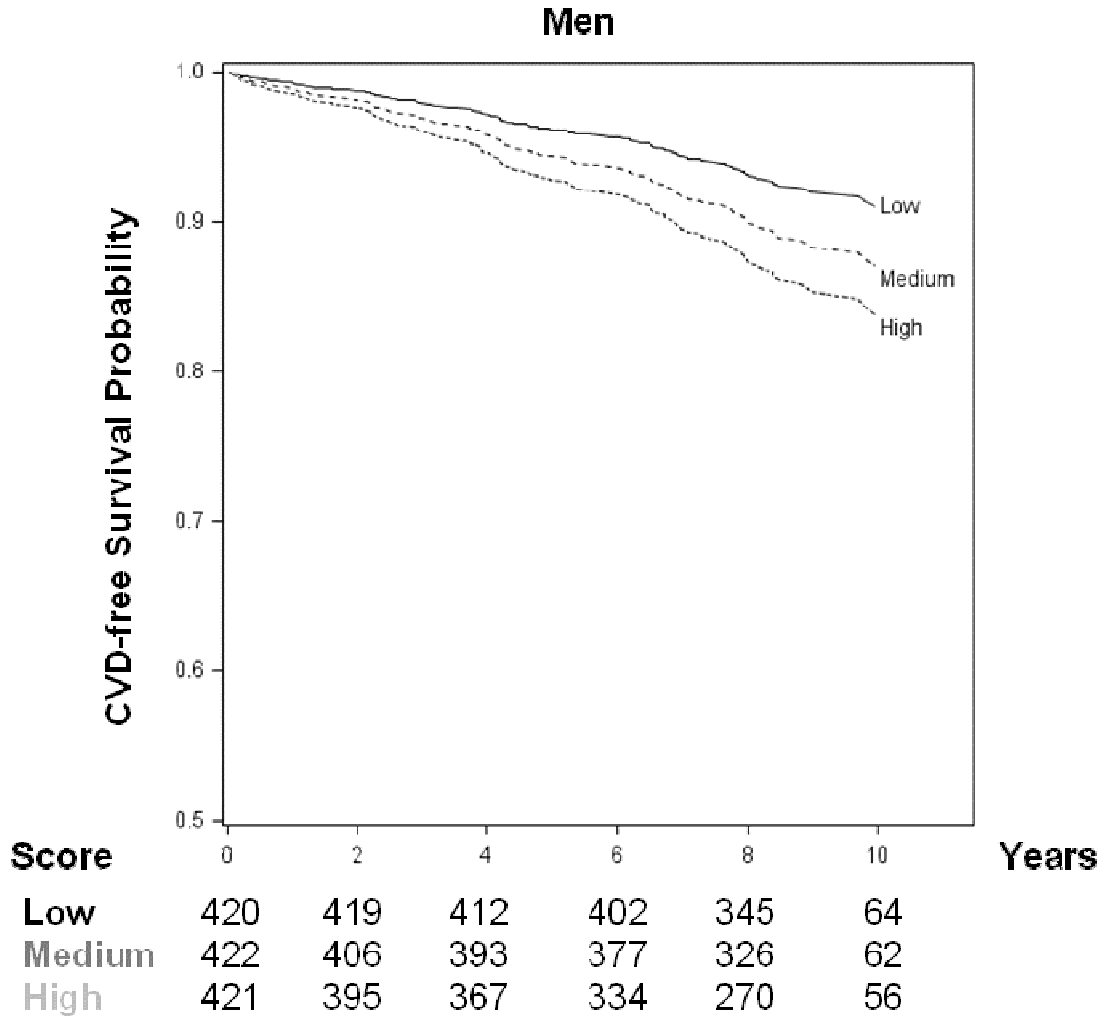

**Inflammatory biomarkers and cardiovascular outcome and mortality**

B.

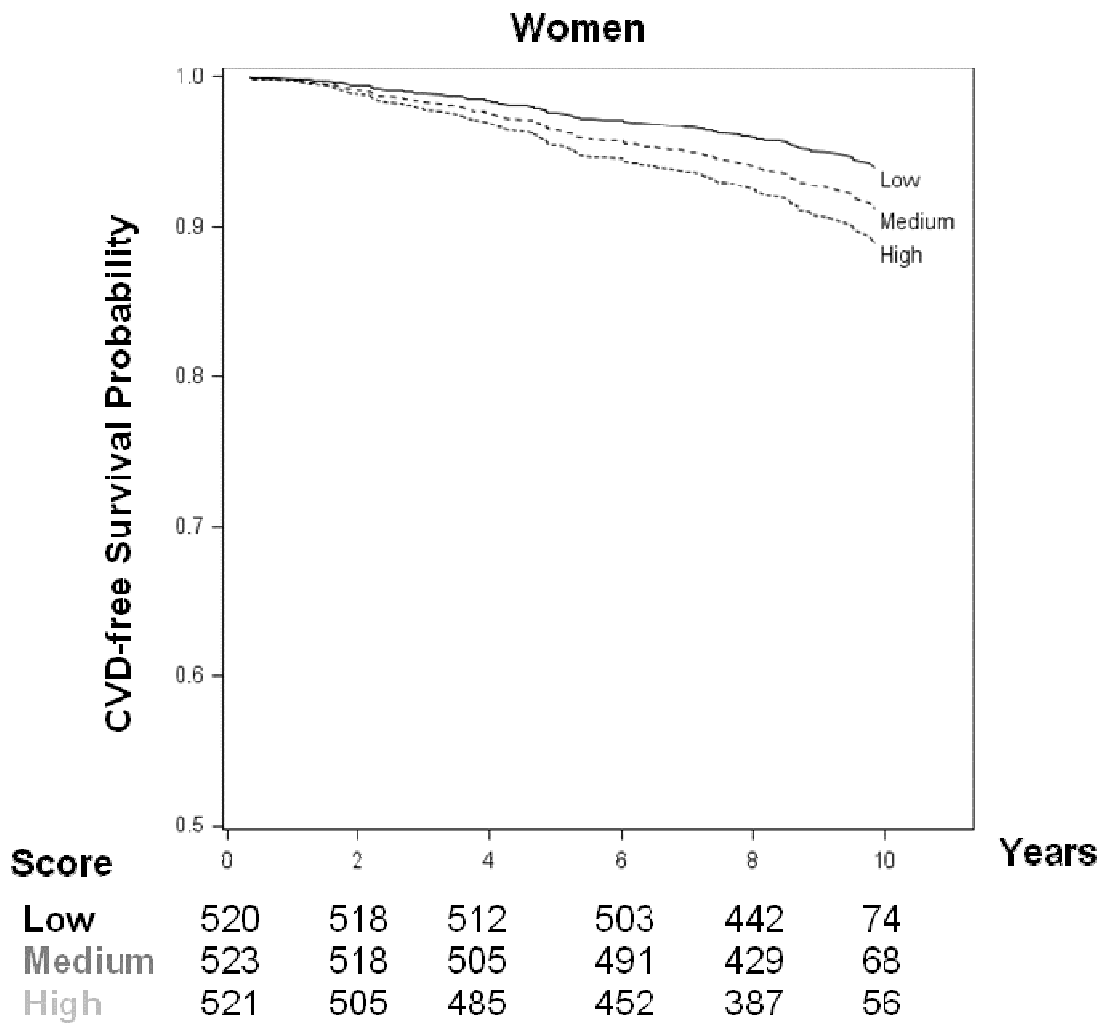

Supplement: NIHMS485696-supplement-01.pdf [file NIHMS485696-supplement-01.pdf]
